# Supplementary material for: Targeting Transcriptional Regulation with a CDK9 Inhibitor Suppresses Growth of Endocrine- and Palbociclib-Resistant ER+ Breast Cancers
Source: PubMed Central journal article supplement (PMC10758688; doi:10.1158/0008-5472.can-23-0650), 2023-10-06
Supplement: can-23-0650_supplementary_figure_s1_suppsf1.pdf [file can-23-0650_supplementary_figure_s1_suppsf1.pdf]

### Supplementary Figure 1

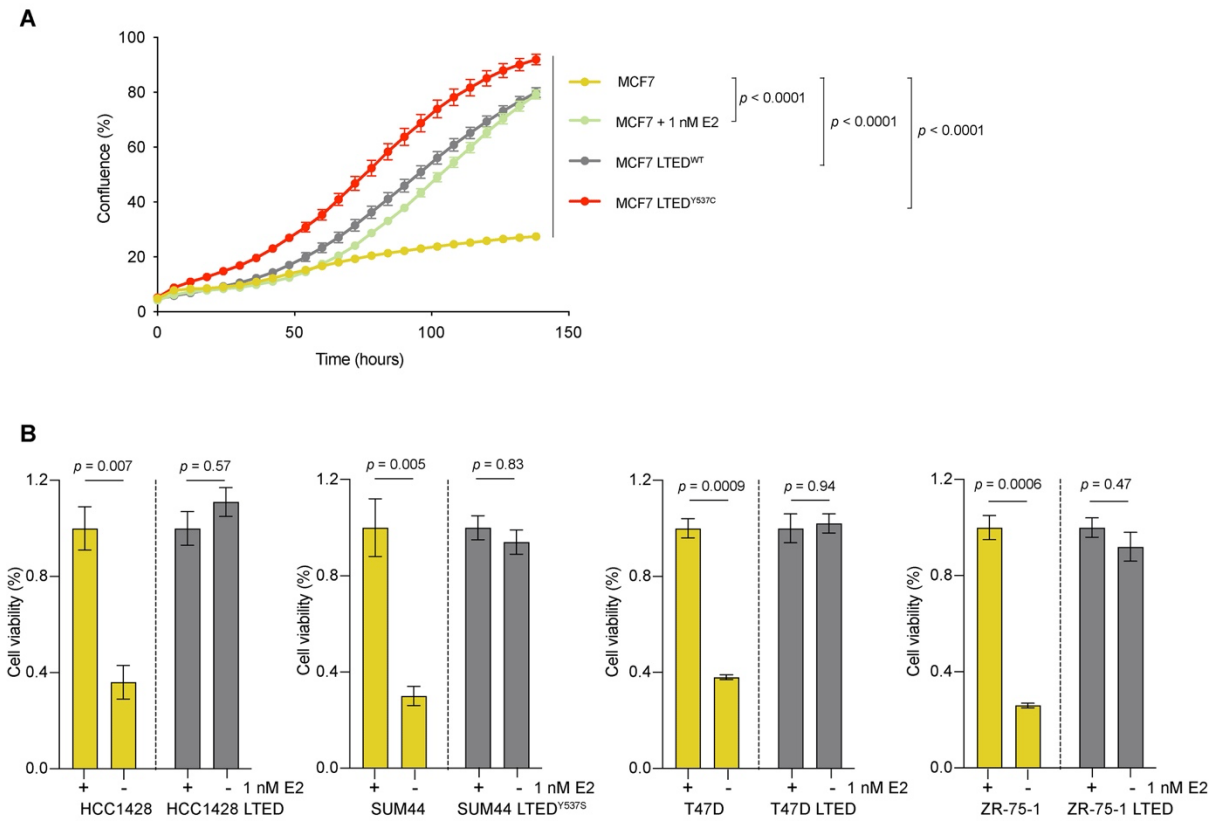

**Supplementary Figure S1. Validation of LTED cell lines. A,** Proliferation of parental and LTED MCF7 lines in E2-deprived conditions.  $1.5 \times 10^4$  cells/well of MCF7, MCF7 LTED<sup>WT</sup> and MCF7 LTED<sup>Y537C</sup> cell lines were seeded into 24-well plates tissue culture plates in RPMI 1640 media supplemented with 10% DCC-FBS with/without supplemental E2. Cell proliferation was monitored over 138 hours using the Incucyte, with images taken every 6 hours. Graph shows mean changes in confluence relative to time zero  $\pm$ SEM.  $n=2$  biological replicates,  $n=6$  technical replicates (two-way ANOVA with Sidak's multiple comparisons test, and confidence intervals of 95%). **B,** 2000-4000 cells/well of parental HCC1428, SUM44, T47D, and ZR-75-1 cells and their LTED derivatives were seeded into 96-well tissue culture plates in RPMI 1640 media supplemented with 10% DCC-FBS with/without E2 (as indicated). After 5 days, cell viability was assessed using CellTiter-Glo. Graphs show mean percentage change in viability relative to E2-treated parental cell line.  $n=2$  biological replicates,  $n=8$  technical replicates,  $\pm$ SEM (one-way ANOVA with Sidak's multiple comparisons test, and confidence intervals of 95%).
