# Supplementary material for: Targeting Transcriptional Regulation with a CDK9 Inhibitor Suppresses Growth of Endocrine- and Palbociclib-Resistant ER+ Breast Cancers
Source: PubMed Central journal article supplement (PMC10758688; doi:10.1158/0008-5472.can-23-0650), 2023-10-06
Supplement: can-23-0650_supplementary_figure_s2_suppsf2.pdf [file can-23-0650_supplementary_figure_s2_suppsf2.pdf]

## Supplementary Figure 2

**A**

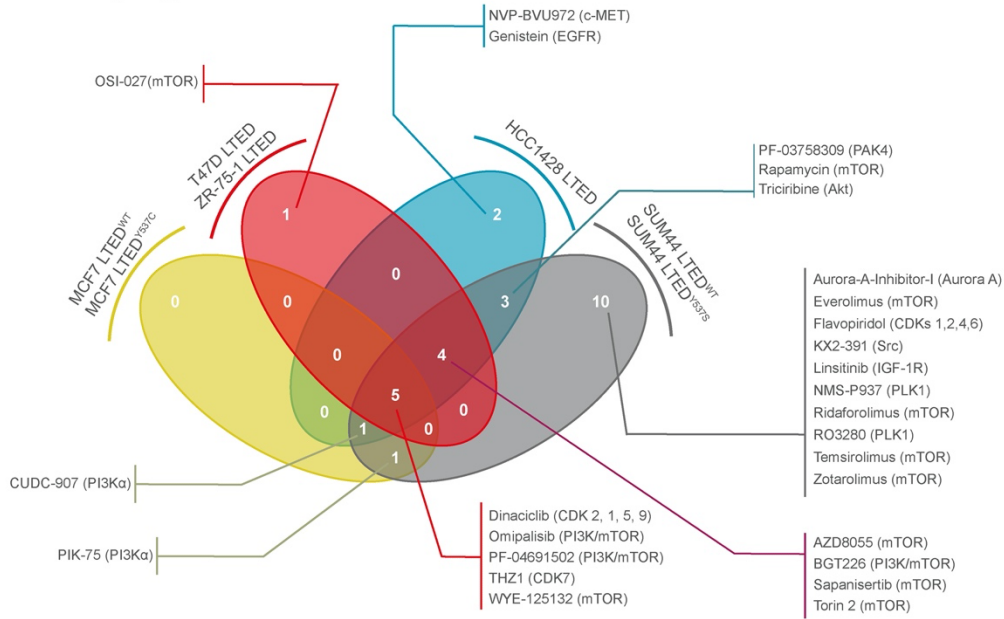

**B**

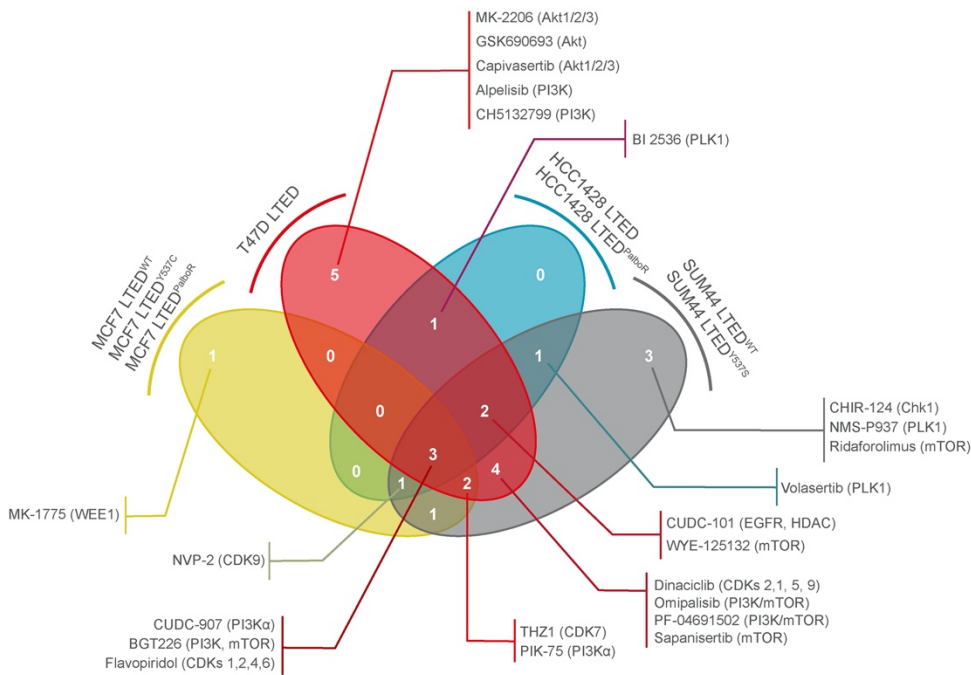

**Supplementary Figure S2.** Kinase inhibitor screens in LTED and palbociclib-resistant breast cancer cell line models. **A**, Extended data associated with **Fig. 1C**. 2D screens at 100 nM final drug concentration. Compounds causing  $\geq 50\%$  reduction in cell viability were classified as hits. **B**, Extended data associated with **Fig. 2A**. 3D assays were performed at 250 nM final drug concentration. Compounds with robust Z-score  $< -1.65$  were classified as hits.
