# Supplementary material for: Targeting Transcriptional Regulation with a CDK9 Inhibitor Suppresses Growth of Endocrine- and Palbociclib-Resistant ER+ Breast Cancers
Source: PubMed Central journal article supplement (PMC10758688; doi:10.1158/0008-5472.can-23-0650), 2023-10-06
Supplement: can-23-0650_supplementary_figure_s3_suppsf3.pdf [file can-23-0650_supplementary_figure_s3_suppsf3.pdf]

### Supplementary Figure 3

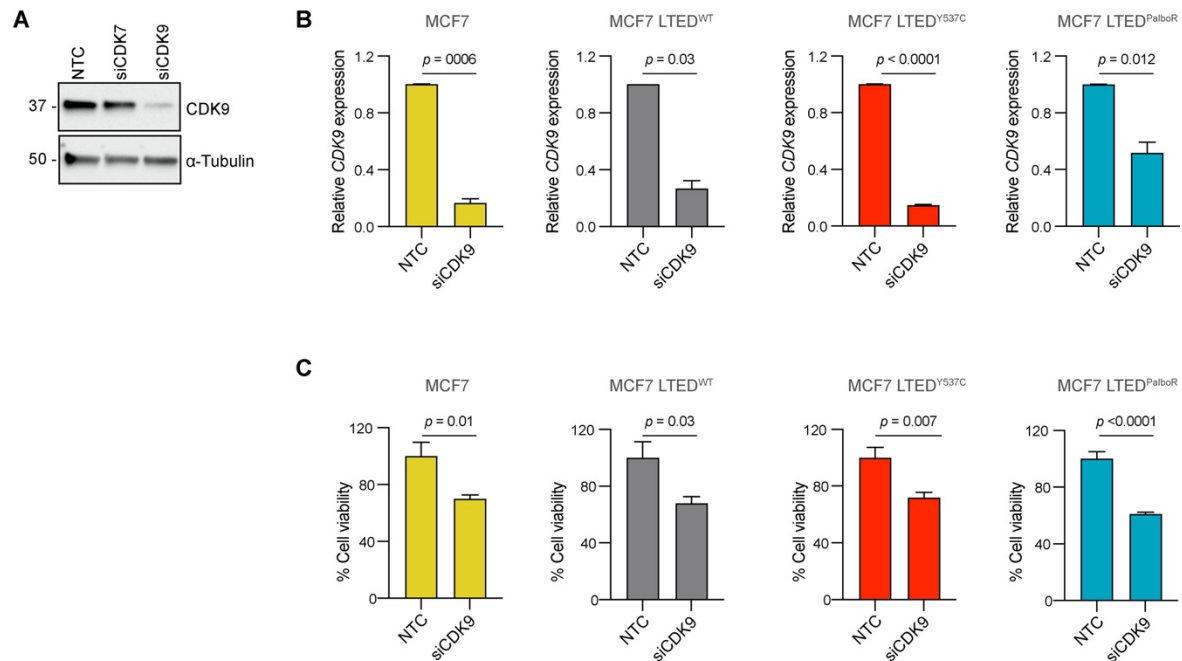

**Supplementary Figure S3.** Effect of CDK9 siRNA on cell viability. **A,B**,  $1 \times 10^6$  -  $5 \times 10^5$  cells were reverse transfected with 25 nM siNTC or 10 nM siCDK9 in 6 cm plates, cells were lysed after 4 days. **A**, Western blot show abundance of CDK9 in the MCF7 LTED<sup>PalboR</sup> cells.  $\alpha$ Tubulin (2125, Cell Signaling, 1:1000), CDK9 (2316, Cell Signaling, 1:1000). Molecular size markers are in kDa. **B**, RTqPCR analysis of *CDK9* expression.  $n=2$  biological replicates,  $n=3$  technical replicates  $\pm$ SEM (two-tailed, unpaired *t*-test) Assay IDs: CDK9, Hs00977896\_g1; *B2M*, Hs00187842\_m1. **C**, 4000-8000 cells were seeded in 96-well plates and reverse transfected as panel A. Barplots represent percentage cell viability in cell lines transfected with siRNA targeting CDK9 (siCDK9) relative to non-targeting control (NTC) ( $n=2$  biological replicates,  $n=6$  technical replicates,  $\pm$ SEM per cell line, two-tailed, unpaired *t*-test).
