# Supplementary material for: Targeting Transcriptional Regulation with a CDK9 Inhibitor Suppresses Growth of Endocrine- and Palbociclib-Resistant ER+ Breast Cancers
Source: PubMed Central journal article supplement (PMC10758688; doi:10.1158/0008-5472.can-23-0650), 2023-10-06
Supplement: can-23-0650_supplementary_figure_s5_suppsf5.pdf [file can-23-0650_supplementary_figure_s5_suppsf5.pdf]

## Supplementary Figure 5

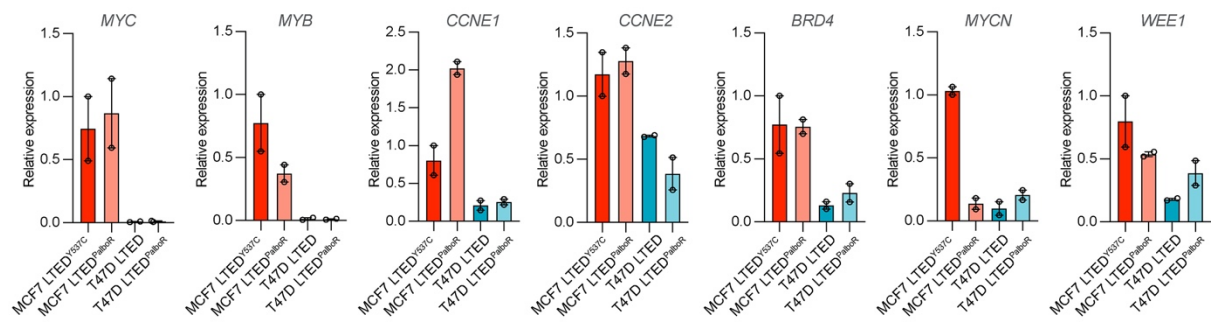

**Supplementary Figure S5.** RTqPCR analysis of cell lines. RTqPCR analysis of *MYC*, *MYB*, *CCNE1*, *CCNE2*, *BRD4*, *MYCN* and *WEE1* expression in MCF7 LTED and T47D LTED and their respective palbociclib resistant lines ( $n=2$  biological replicates,  $n=3$  technical replicates,  $\pm$ SEM per cell line; two-tailed, unpaired  $t$ -test). Assays IDs: *B2M*, Hs00187842\_m1; *BRD4*, Hs04188087\_m1; *CCNE1*, Hs01026536\_m1; *CCNE2*, Hs00180319\_m1; *MCL1*, Hs00766187\_m1; *MYB*, Hs00920556\_m1; *MYC*, Hs00153408\_m1; *MYCN*, Hs00232074\_m1; *WEE1*, Hs00268721\_m1.
